# Supplementary material for: Molecular basis of targeted therapy in T/NK-cell lymphoma/leukemia: A comprehensive genomic and immunohistochemical analysis of a panel of 33 cell lines
Source: PLoS One. 2017 May 15;12(5):e0177524. doi: 10.1371/journal.pone.0177524 (PMC5432176; doi:10.1371/journal.pone.0177524)
Supplement: S3 Table — (XLSX) [file pone.0177524.s003.xlsx]

## Sheet: Supplementary table 3
Supplementary table 3. Antibodies used in immunohistochemical analysis.
	Marker	Source	Dilution	Pretreatment	Staining pattern	Score 0	Score 1	Score 2	Score 3
1	NFATc1	BD Pharmingen	1/100	Steam 20 min EDTA	Nuclear	<5%	6-25%	25-50%	>50%
2	p50	Millipore	1/1000	Steam 20 min EDTA	Nuclear	<5%	6-25%	25-50%	>50%
3	p52	Millipore	1/600	Steam 20 min EDTA	Nuclear	<5%	6-25%	25-50%	>50%
4	C-Rel	Abcam	1/25	Steam 20 min EDTA	Nuclear	<5%	6-25%	25-50%	>50%
5	p65	Santa Cruz Biotech	1/250	Steam 20 min EDTA	Nuclear	<5%	6-25%	25-50%	>50%
6	RelB	Santa Cruz Biotech	1/200	Steam 20 min EDTA	Nuclear	<5%	6-25%	25-50%	>50%
7	p-STAT1	Cell Signaling	1/100	Steam 20 min EDTA	Nuclear	<5%	5-25%	50-75%	>75%
8	p-STAT3	Cell Signaling	1/400	Steam 20 min EDTA	Nuclear	<5%	5-25%	50-75%	>75%
9	p-STAT5	Cell Signaling	1/100	Steam 20 min EDTA	Nuclear	<5%	5-25%	50-75%	>75%
10	C-MYC	Abcam	1/100	Steam 20 min EDTA	Nuclear	<5%	5-25%	50-75%	>75%
11	TCRßF1	Thermo Scientific	1/40	30 min Proteinase k (RTU)	Cytoplasmic	Negative	<10%	10-50%	>50%
12	NOTCH1	Abcam	1/50	Steam 20 min EDTA	Nuclear	<5%	6-25%	25-50%	>50%
13	ALK	Dako	RTU	Steam 20 min citrate buffer (pH 6.0)	Cytoplasmic	Negative	NA	NA	Positive
14	CD30	Dako	RTU	Steam 20 min citrate buffer (pH 6.0)	Cytoplasmic	Negative	<10%	10-50%	<50%
15	P53	Dako	RTU	Steam 20 min EDTA	Nuclear	<5%	5-25%	50-75%	>75%
16	Rb	Abcam	1/100	Steam 20 min EDTA	Nuclear	<5%	5-25%	50-75%	>75%
17	CD56	Dako	RTU	Steam 20 min EDTA	Cytoplasmic	Negative	<10%	10-50%	>50%
18	Granzima B	Dako	1/25	Steam 20 min EDTA	Cytoplasmic, granular	<10%	10-25%	25-50%	>50%
19	TIA-1	Abcam	1/50	Steam 20 min EDTA	Cytoplasmic, granular	<10%	10-25%	25-50%	>50%
20	CD10	Dako	RTU	Steam 20 min EDTA	Cytoplasmic	Negative	<10%	10-50%	>50%
21	BCL6	Dako	RTU	Steam 20 min EDTA	Nuclear	<10%	10-25%	25-50%	>50%
22	PD1	CNIO	1/10	Steam 20 min citrate buffer (pH 6.0)	Cytoplasmic	Negative	<10%	10-50%	>50%
23	CXCL13	R&D Systems	1/200	Steam 20 min EDTA	Cytoplasmic	Negative	NA	NA	Positive
24	RORγ	Millipore	1/200	Steam 20 min EDTA	Nuclear	<5%	5-25%	50-75%	>75%
25	ERK-P	Cell Signaling	1/200	Steam 20 min citrate buffer (pH 6.0)	Nuclear	<10%	10-25%	25-50%	>50%
26	GATA3	Biocare Medical	1/250	Steam 20 min citrate buffer (pH 6.0)	Nuclear	<10%	10-25%	25-50%	>50%
RTU: Ready-to-use
